# Supplementary material for: Data-Driven Cutoff Selection for the Patient Health Questionnaire-9 Depression Screening Tool
Source: PubMed Central journal article supplement (PMC11584932; doi:10.1001/jamanetworkopen.2024.29630), 2024-11-22
Supplement: jamanetwopen-e2429630-s001.pdf [file jamanetwopen-e2429630-s001.pdf]

## Supplemental Online Content

Levis B, Mani Bhandari PM, Neupane D, et al; for the DEPRESSion Screening Data (DEPRESSD) PHQ Group. Variability and bias in optimal cutoff selection and accuracy estimates of depression screening studies. *JAMA Netw Open*. 2024;7(11):e2429630. doi:10.1001/jamanetworkopen.2024.29630

**eMethods 1.** Details on the Methodology Used to Identify, Obtain, and Synthesize the Data Included in the Present Study

**eMethods 2.** Search Strategies

**eTable 1.** Characteristics of Included Primary Studies

**eTable 2.** Frequencies of PHQ-9 Scores Among Participants With and Without Major Depression

**eTable 3.** Differences in Accuracy Estimates of the Sample Optimal Cutoffs Clustered Into Categories Based on Distance From a Cutoff of  $\geq 8$  Compared to Accuracy Estimates From a Cutoff of  $\geq 8$  in the Population

**eTable 4.** Variability of Data-Driven Optimal Cutoffs in 1,000 Samples of Size 100, 200, 500, and 1,000, Among Studies That Used the SCID as the Reference Standard

**eTable 5.** Mean Bias of Accuracy Estimates (With 95% Confidence Intervals) for 1,000 Samples of Size 100, 200, 500, and 1,000, Among Studies That Used the SCID as the Reference Standard

**eFigure.** Distribution of PHQ-9 Scores Among Individuals With and Without Major Depression

This supplemental material has been provided by the authors to give readers additional information about their work.

## **eMethods1. Details on the methodology used to identify, obtain, and synthesize the data included in the present study**

### **Study selection**

In the main IPDMA, datasets from articles in any language were eligible for inclusion if (1) they included PHQ-9 scores; (2) they included diagnostic classifications for current Major Depressive Episode (MDE) or Major Depressive Disorder (MDD) based on DSM<sup>A1-A3</sup> or International Classification of Diseases<sup>A4</sup> criteria, using a validated semi-structured or fully structured interview; (3) the PHQ-9 and diagnostic interview were administered within two weeks of each other, since diagnostic criteria for major depression are for symptoms in the last two weeks; (4) participants were  $\geq 18$  years and not recruited from youth or school-based settings; and (5) participants were not recruited from psychiatric settings or because they were identified as having symptoms of depression, since screening is done to identify unrecognized cases. Datasets where not all participants were eligible were included if primary data allowed selection of eligible participants.

### **Data sources and searches**

A medical librarian searched Medline, Medline In-Process & Other Non-Indexed Citations and PsycInfo via Ovid as well as Web of Science from January 1, 2000 to May 9, 2018, using a peer-reviewed<sup>A5</sup> search strategy (eMethods2). We also reviewed reference lists of relevant reviews and queried contributing authors about non-published studies. Search results were uploaded into RefWorks (RefWorks-COS, Bethesda, MD, USA). After de-duplication, unique citations were uploaded into DistillerSR (Evidence Partners, Ottawa, Canada) for processing review results.

Two investigators independently reviewed titles and abstracts for eligibility. If either investigator deemed a study potentially eligible, full-text review was done by two investigators,

independently, with disagreements resolved by consensus, consulting a third investigator when necessary. Translators were consulted for languages other than those for which team members were fluent.

### **Data contribution and synthesis**

Authors of eligible datasets were invited to contribute de-identified primary data, including PHQ-9 scores and major depression status. We emailed corresponding authors of eligible primary studies at least three times, as necessary, with at least two weeks between each email. If we did not receive a response, we emailed co-authors and attempted to contact corresponding authors by phone.

Individual participant data were converted to a standard format and synthesized into a single dataset. We compared published participant characteristics and diagnostic accuracy results with results from raw datasets and resolved any discrepancies in consultation with the original investigators.

For defining major depression, we considered MDD or MDE based on the DSM or ICD. If more than one was reported, we prioritized MDE over MDD, since screening would attempt to detect depressive episodes and further interview would determine if the episode were related to MDD, bipolar disorder, or persistent depressive disorder, and DSM over ICD.

### **Search results and inclusion of primary datasets**

Of 9,670 unique titles and abstracts identified from the database search, 9,199 were excluded after title and abstract review and 297 after full-text review, leaving 174 eligible articles with data from 118 unique participant samples, of which 91 (77%) contributed datasets. In addition, authors of included studies contributed data from nine unpublished studies, for a total of 100 datasets (N participants = 44,503 participants; N major depression = 4,541).

## eMethods2. Search Strategies

### MEDLINE (OvidSP)

1. PHQ\*.af.
2. patient health questionnaire\*.af.
3. 1 or 2
4. Mass Screening/
5. Psychiatric Status Rating Scales/
6. "Predictive Value of Tests"/
7. "Reproducibility of Results"/
8. exp "Sensitivity and Specificity"/
9. Psychometrics/
10. Prevalence/
11. Reference Values/
- 12.. Reference Standards/
13. exp Diagnostic Errors/
14. Mental Disorders/di, pc [Diagnosis, Prevention & Control]
15. Mood Disorders/di, pc [Diagnosis, Prevention & Control]
16. Depressive Disorder/di, pc [Diagnosis, Prevention & Control]
17. Depressive Disorder, Major/di, pc [Diagnosis, Prevention & Control]
18. Depression, Postpartum/di, pc [Diagnosis, Prevention & Control]
19. Depression/di, pc [Diagnosis, Prevention & Control]
20. validation studies.pt.
21. comparative study.pt.
22. screen\*.af.
23. prevalence.af.
24. predictive value\*.af.
25. detect\*.ti.
26. sensitiv\*.ti.
27. valid\*.ti.
28. revalid\*.ti.
29. predict\*.ti.
30. accura\*.ti.
31. psychometric\*.ti.
32. identif\*.ti.
33. specificit\*.ab.
34. cut?off\*.ab.
35. cut\* score\*.ab.
36. cut?point\*.ab.
37. threshold score\*.ab.
38. reference standard\*.ab.
39. reference test\*.ab.
40. index test\*.ab.
41. gold standard.ab.
42. or/4-41
43. 3 and 42
44. limit 43 to yr="2000-Current"

### PsycINFO (OvidSP)

1. PHQ\*.af.
2. patient health questionnaire\*.af.
3. 1 or 2

4. Diagnosis/
5. Medical Diagnosis/
6. Psychodiagnosis/
7. Misdiagnosis/
8. Screening/
9. Health Screening/
10. Screening Tests/
11. Prediction/
12. Cutting Scores/
13. Psychometrics/
14. Test Validity/
15. screen\*.af.
16. predictive value\*.af.
17. detect\*.ti.
18. sensitiv\*.ti.
19. valid\*.ti.
20. revalid\*.ti.
21. accura\*.ti.
22. psychometric\*.ti.
23. specificit\*.ab.
24. cut?off\*.ab.
25. cut\* score\*.ab.
26. cut?point\*.ab.
27. threshold score\*.ab.
28. reference standard\*.ab.
29. reference test\*.ab.
30. index test\*.ab.
31. gold standard.ab.
32. or/4-31
33. 3 and 32
34. Limit 33 to “2000 to current”

#### **Web of Science (Web of Knowledge)**

#1: TS= (PHQ\* OR “Patient Health Questionnaire\*”)

#2: TS= (screen\* OR prevalence OR “predictive value\*” OR detect\* OR sensitiv\* OR valid\* OR revalid\* OR predict\* OR accura\* OR psychometric\* OR identifi\* OR specificit\* OR cutoff\* OR “cut off\*” OR “cut\* score\*” OR cutpoint\* OR “cut point\*” OR “threshold score\*” OR “reference standard\*” OR “reference test\*” OR “index test\*” OR “gold standard”)

#1 AND #2

Indexes=SCI-EXPANDED, SSCI, A&HCI, CPCI-S, CPCI-SSH Timespan=2000-2018

**eTable1. Characteristics of included primary studies (N = 100)**

| First Author, Year                | Country      | Recruited Population                                                               | Diagnostic Interview | Classification System | Total N | Major Depression<br>N (%) |
|-----------------------------------|--------------|------------------------------------------------------------------------------------|----------------------|-----------------------|---------|---------------------------|
| <b>Semi-structured Interviews</b> |              |                                                                                    |                      |                       |         |                           |
| Alamri, 2017 <sup>A6</sup>        | Saudi Arabia | Hospitalized elderly in medical and surgical wards                                 | SCID                 | DSM-IV                | 199     | 24 (12)                   |
| Amoozegar, 2017 <sup>A7</sup>     | Canada       | Migraine patients                                                                  | SCID                 | DSM-IV                | 203     | 49 (24)                   |
| Amtmann, 2015 <sup>A8</sup>       | USA          | Multiple sclerosis patients                                                        | SCID                 | DSM-IV                | 164     | 48 (29)                   |
| Ayalon, 2010 <sup>A9</sup>        | Israel       | Elderly primary care patients                                                      | SCID                 | DSM-IV                | 151     | 6 (4)                     |
| Beraldi, 2014 <sup>A10</sup>      | Germany      | Cancer inpatients                                                                  | SCID                 | DSM-IV                | 116     | 7 (6)                     |
| Bernstein, 2018 <sup>A11</sup>    | Canada       | IBD patients                                                                       | SCID                 | DSM-IV                | 240     | 21 (9)                    |
| Bhana, 2015 <sup>A12</sup>        | South Africa | Chronic care patients                                                              | SCID                 | DSM-IV                | 679     | 78 (11)                   |
| Bombardier, 2012 <sup>A13</sup>   | USA          | Inpatients with spinal cord injuries                                               | SCID                 | DSM-IV                | 160     | 14 (9)                    |
| Chagas, 2013 <sup>A14</sup>       | Brazil       | Outpatients with Parkinson's Disease                                               | SCID                 | DSM-IV                | 84      | 19 (23)                   |
| Chibanda, 2016 <sup>A15</sup>     | Zimbabwe     | A primary care population with high HIV prevalence                                 | SCID                 | DSM-IV                | 264     | 149 (56)                  |
| Eack, 2006 <sup>A16</sup>         | USA          | Women seeking psychiatric services for their children at two mental health centers | SCID                 | DSM-IV                | 48      | 12 (25)                   |
| Fann, 2005 <sup>A17</sup>         | USA          | Inpatients with traumatic brain injury                                             | SCID                 | DSM-IV                | 135     | 45 (33)                   |
| Fiest, 2014 <sup>A18</sup>        | Canada       | Epilepsy outpatients                                                               | SCID                 | DSM-IV                | 169     | 23 (14)                   |
| Fischer, 2014 <sup>A19</sup>      | Germany      | Heart failure patients                                                             | SCID                 | DSM-IV                | 194     | 11 (6)                    |

|                                    |           |                                                                                          |      |           |      |         |
|------------------------------------|-----------|------------------------------------------------------------------------------------------|------|-----------|------|---------|
| Gjerdingen, 2009 <sup>A20</sup>    | USA       | Mothers registering their newborns for well-child visits at medical or pediatric clinics | SCID | DSM-IV    | 419  | 19 (5)  |
| Gräfe, 2004 <sup>A21</sup>         | Germany   | Medical and psychosomatic outpatients                                                    | SCID | DSM-IV    | 494  | 67 (14) |
| Green, 2017 <sup>A22</sup>         | USA       | Returning veterans                                                                       | SCID | DSM-V     | 176  | 22 (13) |
| Green, 2018 <sup>A23</sup>         | Kenya     | Pregnant women and new mothers                                                           | SCID | DSM-V     | 192  | 10 (5)  |
| Haroz, 2017 <sup>A24</sup>         | Myanmar   | Primary care patients                                                                    | SCID | DSM-IV    | 132  | 29 (22) |
| Hitchon, 2019 <sup>A25a</sup>      | Canada    | Rheumatoid arthritis patients                                                            | SCID | DSM-IV    | 148  | 16 (11) |
| Khamseh, 2011 <sup>A26</sup>       | Iran      | Type 2 diabetes patients                                                                 | SCID | DSM-IV    | 184  | 79 (43) |
| Kwan, 2012 <sup>A27</sup>          | Singapore | Post-stroke inpatients undergoing rehabilitation                                         | SCID | DSM-IV-TR | 113  | 3 (3)   |
| Lambert, 2015 <sup>A28</sup>       | Australia | Cancer patients                                                                          | SCID | DSM-IV    | 147  | 21 (14) |
| Lara, 2015 <sup>A29</sup>          | Mexico    | Pregnant women during the third trimester of pregnancy                                   | SCID | DSM-IV    | 280  | 29 (10) |
| Liu, 2011 <sup>A30</sup>           | Taiwan    | Primary care patients                                                                    | SCAN | DSM-IV    | 1532 | 50 (3)  |
| Marrie, 2018 <sup>A31</sup>        | Canada    | Multiple sclerosis patients                                                              | SCID | DSM-IV    | 244  | 25 (10) |
| Martin-Subero, 2017 <sup>A32</sup> | Spain     | Medical inpatients                                                                       | SCID | DSM-III   | 1003 | 83 (8)  |
| McGuire, 2013 <sup>A33</sup>       | USA       | Acute coronary syndrome inpatients                                                       | DISH | DSM-IV    | 100  | 9 (9)   |
| Osório, 2009 <sup>A34</sup>        | Brazil    | Women in primary care                                                                    | SCID | DSM-IV    | 177  | 60 (34) |
| Osório, 2012 <sup>A35</sup>        | Brazil    | Inpatients from various clinical wards                                                   | SCID | DSM-IV    | 86   | 28 (33) |
| Patten, 2015 <sup>A36</sup>        | Canada    | Multiple sclerosis patients                                                              | SCID | DSM-IV    | 143  | 20 (14) |
| Picardi, 2005 <sup>A37</sup>       | Italy     | Inpatients with skin diseases                                                            | SCID | DSM-IV    | 138  | 12 (9)  |

|                                     |                 |                                                                           |      |        |     |         |
|-------------------------------------|-----------------|---------------------------------------------------------------------------|------|--------|-----|---------|
| Prisnie, 2016 <sup>A38</sup>        | Canada          | Stroke and transient ischemic attack patients                             | SCID | DSM-IV | 114 | 11 (10) |
| Quinn, Unpublished <sup>A39a</sup>  | UK              | Stroke patients                                                           | SCID | DSM-V  | 146 | 17 (12) |
| Richardson, 2010 <sup>A40</sup>     | USA             | Older adults undergoing in-home aging services care management assessment | SCID | DSM-IV | 377 | 95 (25) |
| Rooney, 2013 <sup>A41</sup>         | UK              | Patients with cerebral glioma                                             | SCID | DSM-IV | 126 | 14 (11) |
| Shinn, 2017 <sup>A42</sup>          | USA             | Cancer patients                                                           | SCID | DSM-IV | 139 | 12 (9)  |
| Sidebottom, 2012 <sup>A43</sup>     | USA             | Pregnant women                                                            | SCID | DSM-IV | 246 | 12 (5)  |
| Simning, 2012 <sup>A44</sup>        | USA             | Older adults living in public housing                                     | SCID | DSM-IV | 190 | 10 (5)  |
| Spangenberg, 2015 <sup>A45</sup>    | Germany         | Primary care patients                                                     | SCID | DSM-IV | 160 | 1 (1)   |
| Turner, 2012 <sup>A46</sup>         | Australia       | Stroke patients                                                           | SCID | DSM-IV | 72  | 13 (18) |
| Turner, Unpublished <sup>A47a</sup> | Australia       | Cardiac rehabilitation patients                                           | SCID | DSM-IV | 51  | 4 (8)   |
| Twist, 2013 <sup>A48</sup>          | UK              | Type 2 diabetes outpatients                                               | SCAN | DSM-IV | 360 | 80 (22) |
| Vöhringer, 2013 <sup>A49</sup>      | Chile           | Primary care patients                                                     | SCID | DSM-IV | 190 | 59 (31) |
| Wagner, 2017 <sup>A50</sup>         | USA             | Patients starting radiotherapy for the first diagnosis of any tumor       | SCID | DSM-IV | 54  | 6 (11)  |
| Williams, 2012 <sup>A51</sup>       | USA             | Parkinson's Disease patients                                              | SCID | DSM-IV | 235 | 61 (26) |
| Wittkamp, 2009 <sup>A52</sup>       | The Netherlands | Primary care patients at risk for depression                              | SCID | DSM-IV | 260 | 45 (17) |

---

### Fully structured Interviews

---

|                             |             |                                          |      |        |      |         |
|-----------------------------|-------------|------------------------------------------|------|--------|------|---------|
| Arroll, 2010 <sup>A53</sup> | New Zealand | Primary care patients                    | CIDI | DSM-IV | 2528 | 156 (6) |
| Azah, 2005 <sup>A54</sup>   | Malaysia    | Adults attending family medicine clinics | CIDI | ICD-10 | 180  | 30 (17) |



|                                        |                 |                                                                |       |        |      |          |
|----------------------------------------|-----------------|----------------------------------------------------------------|-------|--------|------|----------|
| de Man-van Ginkel, 2012 <sup>A55</sup> | The Netherlands | Stroke patients                                                | CIDI  | DSM-IV | 382  | 54 (14)  |
| Delgadillo, 2011 <sup>A56</sup>        | UK              | Injecting drug users                                           | CIS-R | ICD-10 | 103  | 51 (50)  |
| Fisher, 2016 <sup>A57</sup>            | Australia       | Primiparous women less than 6 weeks postpartum                 | CIDI  | DSM-IV | 357  | 4 (1)    |
| Gelaye, 2014 <sup>A58</sup>            | Ethiopia        | Outpatients at a general hospital                              | CIDI  | DSM-IV | 923  | 162 (18) |
| Grool, 2011 <sup>A59</sup>             | The Netherlands | Non-demented patients with symptomatic atherosclerotic disease | CIDI  | DSM-IV | 477  | 22 (5)   |
| Hahn, 2006 <sup>A60</sup>              | Germany         | Patients with chronic illnesses from rehabilitation centers    | CIDI  | DSM-IV | 211  | 18 (9)   |
| Henkel, 2004 <sup>A61</sup>            | Germany         | Primary care patients                                          | CIDI  | ICD-10 | 430  | 43 (10)  |
| Hobfoll, 2011 <sup>A62</sup>           | Israel          | Jewish and Palestinian residents of Jerusalem exposed to war   | CIDI  | DSM-IV | 144  | 42 (29)  |
| Kiely, 2014 <sup>A63</sup>             | Australia       | Community sample of adults                                     | CIDI  | ICD-10 | 822  | 33 (4)   |
| Kim, 2017 <sup>A64</sup>               | South Korea     | Randomly selected adults                                       | CIDI  | DSM-IV | 3071 | 205 (7)  |
| Kohrt, 2016 <sup>A65</sup>             | Nepal           | Primary care patients                                          | CIDI  | DSM-IV | 125  | 17 (14)  |
| Liu, 2015 <sup>A66</sup>               | Canada          | Working population                                             | CIDI  | DSM-IV | 4182 | 91 (2)   |
| Mohd Sidik, 2012 <sup>A67</sup>        | Malaysia        | Primary care patients                                          | CIDI  | DSM-IV | 146  | 31 (21)  |
| Patel, 2008 <sup>A68</sup>             | India           | Primary care patients                                          | CIS-R | ICD-10 | 299  | 13 (4)   |
| Pence, 2012 <sup>A69</sup>             | Cameroon        | HIV-infected patients                                          | CIDI  | DSM-IV | 398  | 11 (3)   |
| Razykov, 2013 <sup>A70</sup>           | Canada          | Patients with systemic sclerosis                               | CIDI  | DSM-IV | 345  | 13 (4)   |
| Thombs, 2008 <sup>A71</sup>            | USA             | Outpatients with coronary artery disease                       | C-DIS | DSM-IV | 1006 | 221 (22) |

|                                                              |                 |                                                                                        |      |        |      |          |
|--------------------------------------------------------------|-----------------|----------------------------------------------------------------------------------------|------|--------|------|----------|
| Zuithoff, 2009 <sup>A72</sup>                                | The Netherlands | General practice patients                                                              | CIDI | DSM-IV | 1038 | 135 (13) |
| <b>Mini International Neuropsychiatric Interviews (MINI)</b> |                 |                                                                                        |      |        |      |          |
| Akena, 2013 <sup>A73</sup>                                   | Uganda          | HIV/AIDS patients                                                                      | MINI | DSM-IV | 91   | 11 (12)  |
| Baron, 2017 <sup>A74</sup>                                   | South Africa    | Xhosa, Afrikaans and Zulu-speaking general population                                  | MINI | DSM-IV | 851  | 93 (11)  |
| Buji, 2018 <sup>A75</sup>                                    | Malaysia        | Patients with systemic lupus erythematosus                                             | MINI | DSM-IV | 130  | 5 (4)    |
| Cholera, 2014 <sup>A76</sup>                                 | South Africa    | Patients undergoing routine HIV counseling and testing at a primary health care clinic | MINI | DSM-IV | 397  | 47 (12)  |
| Conway, 2016 <sup>A77</sup>                                  | Australia       | Heart transplant recipients                                                            | MINI | DSM-IV | 26   | 2 (8)    |
| de la Torre, 2016 <sup>A78</sup>                             | Argentina       | Hospitalized general medical patients                                                  | MINI | DSM-IV | 257  | 69 (27)  |
| Garabiles, 2020 <sup>A79a</sup>                              | China           | Female Filipino domestic workers in Macao                                              | MINI | DSM-IV | 99   | 39 (39)  |
| Gholizadeh, 2019 <sup>A80a</sup>                             | Iran            | Coronary artery disease patients                                                       | MINI | DSM-IV | 79   | 12 (15)  |
| Hantsoo, 2017 <sup>A81</sup>                                 | USA             | General population                                                                     | MINI | DSM-IV | 321  | 19 (6)   |
| Hides, 2007 <sup>A82</sup>                                   | Australia       | Injection drug users accessing a needle and syringe program                            | MINI | DSM-IV | 103  | 47 (46)  |
| Hyphantis, 2011 <sup>A83</sup>                               | Greece          | Patients with various rheumatologic disorders                                          | MINI | DSM-IV | 213  | 69 (32)  |
| Hyphantis, 2014 <sup>A84</sup>                               | Greece          | Patients with chronic illnesses presenting at the emergency department                 | MINI | DSM-IV | 349  | 95 (27)  |

|                                     |                 |                                                                                               |      |           |      |          |
|-------------------------------------|-----------------|-----------------------------------------------------------------------------------------------|------|-----------|------|----------|
| Inagaki, 2013 <sup>A85</sup>        | Japan           | Internal medicine outpatients                                                                 | MINI | DSM-III-R | 104  | 21 (20)  |
| Janssen, 2016 <sup>A86</sup>        | The Netherlands | General population and Type 2 diabetes patients                                               | MINI | DSM-IV    | 4695 | 156 (3)  |
| Lamers, 2008 <sup>A87</sup>         | The Netherlands | Elderly primary care patients with diabetes mellitus or chronic obstructive pulmonary disease | MINI | DSM-IV    | 104  | 59 (57)  |
| Levin-Aspenson, 2017 <sup>A88</sup> | USA             | General population                                                                            | MINI | DSM-V     | 408  | 66 (16)  |
| Liu, 2016 <sup>A89</sup>            | China           | General hospital outpatients                                                                  | MINI | DSM-IV    | 1997 | 97 (5)   |
| Lotrakul, 2008 <sup>A90</sup>       | Thailand        | Outpatients                                                                                   | MINI | DSM-IV    | 278  | 19 (7)   |
| Muramatsu, 2007 <sup>A91</sup>      | Japan           | Primary care patients                                                                         | MINI | DSM-IV    | 116  | 32 (28)  |
| Muramatsu, 2018 <sup>A92</sup>      | Japan           | Primary care patients                                                                         | MINI | DSM-IV    | 152  | 46 (30)  |
| Nakku, 2016 <sup>A93</sup>          | Uganda          | Primary patients and hospital outpatients                                                     | MINI | DSM-IV    | 153  | 84 (55)  |
| Paika, 2017 <sup>A94</sup>          | Greece          | Patients with long term medical conditions                                                    | MINI | DSM-IV    | 474  | 98 (21)  |
| Persoons, 2001 <sup>A95</sup>       | Belgium         | Inpatients and patients at gastroenterological and hepatology wards                           | MINI | DSM-IV    | 173  | 28 (16)  |
| Rancans, 2018 <sup>A96</sup>        | Latvia          | Primary care patients                                                                         | MINI | DSM-IV    | 1467 | 147 (10) |
| Santos, 2013 <sup>A97</sup>         | Brazil          | General population                                                                            | MINI | DSM-IV    | 196  | 25 (13)  |
| Stafford, 2007 <sup>A98</sup>       | Australia       | Inpatients with coronary artery disease who had undergone surgery                             | MINI | DSM-IV    | 193  | 35 (18)  |
| Sung, 2013 <sup>A99</sup>           | Singapore       | Primary care patients                                                                         | MINI | DSM-IV    | 399  | 12 (3)   |
| Suzuki, 2015 <sup>A100</sup>        | Japan           | Outpatients in general medicine department                                                    | MINI | DSM-IV    | 511  | 42 (8)   |
| van Heyningen, 2018 <sup>A101</sup> | South Africa    | Pregnant women                                                                                | MINI | DSM-IV    | 373  | 81 (22)  |

|                                                   |                  |                             |      |        |      |         |
|---------------------------------------------------|------------------|-----------------------------|------|--------|------|---------|
| van Steenbergen-Weijnenburg, 2010 <sup>A102</sup> | The Netherlands  | Diabetes patients           | MINI | DSM-IV | 196  | 37 (19) |
| Volker, 2016 <sup>A103</sup>                      | The Netherlands  | Employees on sickness leave | MINI | DSM-IV | 93   | 23 (25) |
| Wang, 2014 <sup>A104</sup>                        | China            | General population          | MINI | DSM-IV | 1036 | 28 (3)  |
| Zhang, 2013 <sup>A105</sup>                       | Hong Kong, China | Type 2 diabetes patients    | MINI | DSM-IV | 68   | 17 (25) |

---

**Abbreviations:** C-DIS: Computerized Diagnostic Interview Schedule; CIDI: Composite International Diagnostic Interview; CIS-R: Clinical Interview Schedule Revised; DISH: Depression Interview and Structured Hamilton; DSM: Diagnostic and Statistical Manual of Mental Disorders; ICD: International Classification of Diseases; MINI: Mini Neuropsychiatric Diagnostic Interview; SCAN: Schedules for Clinical Assessment in Neuropsychiatry; SCID: Structured Clinical Interview for DSM Disorders; UK: United Kingdom; USA: United States of America.

<sup>a</sup>Was unpublished at the time of electronic database search

**eTable2. Frequencies of PHQ-9 scores among participants with and without major depression**

| <b>PHQ-9 score</b> | <b>N participants with PHQ-9 score</b> | <b>N (%) with major depression among those with PHQ-9 score</b> | <b>N (%) without major depression among those with PHQ-9 score</b> |
|--------------------|----------------------------------------|-----------------------------------------------------------------|--------------------------------------------------------------------|
| 0                  | 8,811                                  | 89 (1%)                                                         | 8722 (99%)                                                         |
| 1                  | 5,109                                  | 51 (1%)                                                         | 5058 (99%)                                                         |
| 2                  | 4,795                                  | 63 (1%)                                                         | 4732 (99%)                                                         |
| 3                  | 4,195                                  | 81 (2%)                                                         | 4114 (98%)                                                         |
| 4                  | 3,463                                  | 103 (3%)                                                        | 3360 (97%)                                                         |
| 5                  | 2,880                                  | 141 (5%)                                                        | 2739 (95%)                                                         |
| 6                  | 2,379                                  | 182 (8%)                                                        | 2197 (92%)                                                         |
| 7                  | 2,012                                  | 181 (9%)                                                        | 1831 (91%)                                                         |
| 8                  | 1,744                                  | 213 (12%)                                                       | 1531 (88%)                                                         |
| 9                  | 1,501                                  | 221 (15%)                                                       | 1280 (85%)                                                         |
| 10                 | 1,136                                  | 235 (21%)                                                       | 901 (79%)                                                          |
| 11                 | 951                                    | 239 (25%)                                                       | 712 (75%)                                                          |
| 12                 | 921                                    | 286 (31%)                                                       | 635 (69%)                                                          |
| 13                 | 740                                    | 259 (35%)                                                       | 481 (65%)                                                          |
| 14                 | 698                                    | 275 (39%)                                                       | 423 (61%)                                                          |
| 15                 | 573                                    | 266 (46%)                                                       | 307 (54%)                                                          |
| 16                 | 508                                    | 277 (55%)                                                       | 231 (45%)                                                          |
| 17                 | 398                                    | 216 (54%)                                                       | 182 (46%)                                                          |
| 18                 | 367                                    | 198 (54%)                                                       | 169 (46%)                                                          |
| 19                 | 265                                    | 166 (63%)                                                       | 99 (37%)                                                           |
| 20                 | 231                                    | 161 (70%)                                                       | 70 (30%)                                                           |
| 21                 | 217                                    | 156 (72%)                                                       | 61 (28%)                                                           |
| 22                 | 149                                    | 112 (75%)                                                       | 37 (25%)                                                           |
| 23                 | 131                                    | 96 (73%)                                                        | 35 (27%)                                                           |
| 24                 | 120                                    | 95 (79%)                                                        | 25 (21%)                                                           |
| 25                 | 93                                     | 76 (82%)                                                        | 17 (18%)                                                           |
| 26                 | 34                                     | 31 (91%)                                                        | 3 (9%)                                                             |
| 27                 | 82                                     | 72 (88%)                                                        | 10 (12%)                                                           |
| <b>Total</b>       | <b>44,503</b>                          | <b>4,541 (10%)</b>                                              | <b>39,962 (90%)</b>                                                |

**eTable3. Bias<sup>a</sup> in accuracy estimates of the sample optimal cutoffs clustered into categories based on distance from a cutoff of  $\geq 8$  compared to accuracy estimates from a cutoff of  $\geq 8$  in the population**

| Optimal cutoff | Sample size = 100 |                   |                      | Sample size = 200 |                   |                      | Sample size = 500 |                   |                    | Sample size = 1,000 |                   |                      |
|----------------|-------------------|-------------------|----------------------|-------------------|-------------------|----------------------|-------------------|-------------------|--------------------|---------------------|-------------------|----------------------|
|                | N                 | Sensitivity       | Specificity          | N                 | Sensitivity       | Specificity          | N                 | Sensitivity       | Specificity        | N                   | Sensitivity       | Specificity          |
| $\leq 5$       | 93                | 15.2 (13.8, 16.5) | -17.2 (-18.5, -15.8) | 69                | 14 (12.8, 15.3)   | -16.3 (-17.5, -15.2) | 30                | 11.8 (10.2, 13.4) | -15.9 (-16.8, -15) | 6                   | 12.3 (10.8, 13.8) | -15.8 (-17.2, -14.4) |
| 6 – 7          | 279               | 10 (8.9, 11.0)    | -6 (-6.6, -5.4)      | 319               | 9.7 (9, 10.4)     | -6.1 (-6.6, -5.7)    | 319               | 6.8 (6.2, 7.3)    | -5.9 (-6.3, -5.6)  | 353                 | 6.2 (5.8, 6.6)    | -5.9 (-6.2, -5.6)    |
| 8              | 165               | 7.4 (5.9, 8.9)    | 0.5 (-0.1, 1.0)      | 215               | 5.6 (4.7, 6.6)    | 0.1 (-0.3, 0.4)      | 264               | 2.5 (1.9, 3.1)    | 0.2 (0.0, 0.5)     | 333                 | 1.4 (1.0, 1.8)    | 0.1 (0.0, 0.3)       |
| 9 – 10         | 250               | 4.4 (3.2, 5.7)    | 5.5 (5.0, 6.0)       | 276               | 0.7 (-0.3, 1.7)   | 5.5 (5.1, 5.8)       | 333               | -1.5 (-2.1, -1.0) | 5.2 (4.9, 5.4)     | 295                 | -2.9 (-3.3, -2.4) | 4.7 (4.5, 4.9)       |
| $\geq 11$      | 213               | -0.5 (-2.2, 1.2)  | 11.3 (10.9, 11.7)    | 121               | -4.6 (-6.3, -2.9) | 10.5 (10.1, 11)      | 54                | -8.2 (-9.5, -6.9) | 10 (9.6, 10.4)     | 13                  | -7.3 (-9.0, -5.5) | 9.4 (8.7, 10.0)      |

N = Number of samples, NA = Not applicable

Differences are presented as mean difference (95% confidence interval)

<sup>a</sup>Calculated as sample-specific optimal cutoff – population optimal cutoff of  $\geq 8$ , where sample-specific optimal cutoff refers to the cutoff maximizing Youden's J in each simulated sample, and the optimal cutoff in the full PHQ-9 IPDMA dataset is  $\geq 8$  (sensitivity = 80.4%, specificity = 82.0%)

**eTable4.** Variability of data-driven optimal cutoffs in 1,000 samples of size 100, 200, 500, and 1,000, among studies that used the SCID as the reference standard<sup>a</sup>

| Sample-specific optimal cutoff | Sample size = 100<br>N samples | Sample size = 200<br>N samples | Sample size = 500<br>N samples | Sample size = 1,000<br>N samples |
|--------------------------------|--------------------------------|--------------------------------|--------------------------------|----------------------------------|
| ≥ 5                            | 7                              |                                |                                |                                  |
| ≥ 6                            | 17                             | 5                              |                                |                                  |
| ≥ 7                            | 47                             | 35                             | 11                             | 1                                |
| ≥ 8                            | 79                             | 67                             | 32                             | 8                                |
| ≥ 9                            | 135                            | 145                            | 134                            | 94                               |
| ≥ 10                           | 150                            | 193                            | 230                            | 252                              |
| ≥ 11                           | 210                            | 294                            | 425                            | 546                              |
| ≥ 12                           | 192                            | 176                            | 150                            | 95                               |
| ≥ 13                           | 70                             | 44                             | 16                             | 4                                |
| ≥ 14                           | 63                             | 32                             | 2                              |                                  |
| ≥ 15                           | 20                             | 9                              |                                |                                  |
| ≥ 16                           | 5                              |                                |                                |                                  |
| ≥ 17                           | 3                              |                                |                                |                                  |
| ≥ 18                           | 2                              |                                |                                |                                  |

SCID, Structured Clinical Interview for DSM

<sup>a</sup> N studies = 44, N participants = 9242, N major depression = 1389

**eTable5.** Mean bias of accuracy estimates (with 95% confidence intervals) for 1,000 samples of size 100, 200, 500, and 1,000, among studies that used the SCID as the reference standard<sup>a</sup>

|                                                                                                                       | Sample size = 100 |                   | Sample size = 200 |                   | Sample size = 500 |                  | Sample size = 1,000 |                   |
|-----------------------------------------------------------------------------------------------------------------------|-------------------|-------------------|-------------------|-------------------|-------------------|------------------|---------------------|-------------------|
|                                                                                                                       | Sensitivity       | Specificity       | Sensitivity       | Specificity       | Sensitivity       | Specificity      | Sensitivity         | Specificity       |
| <b>Sample-specific optimal cutoff<sup>b</sup> –<br/>Population optimal cutoff of <math>\geq 11</math><sup>c</sup></b> | 6.8 (6.2, 7.4)    | -1.9 (-2.4, -1.4) | 4.4 (3.9, 4.9)    | -1.7 (-2.1, -1.3) | 2.6 (2.3, 2.9)    | -1.7 (-1.4, 2.0) | 2.0 (1.8, 2.2)      | -1.5 (-1.7, -1.3) |

Differences are presented as mean difference (95% confidence interval)

SCID, Structured Clinical Interview for DSM

<sup>a</sup> N studies = 44, N participants = 9242, N major depression = 1389

<sup>b</sup> Sample-specific optimal cutoff refers to the cutoff maximizing Youden's J in each simulated sample

<sup>c</sup> the optimal cutoff in the subset of the PHQ-9 IPDMA dataset that used the SCID as the reference standard is  $\geq 11$  (sensitivity = 78.1%, specificity = 85.3%)



**eFigure 1.** Distribution of PHQ-9 scores among individuals with and without major depression

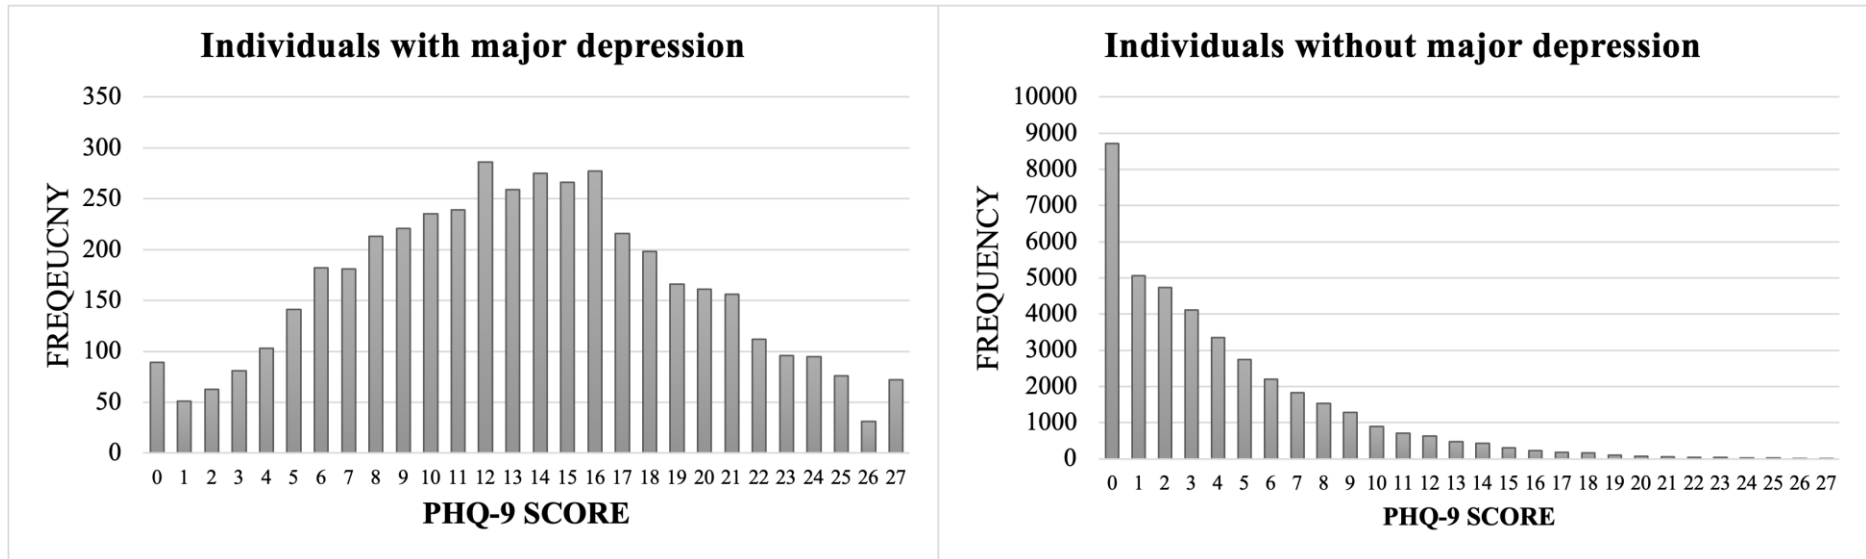

## REFERENCES

- A1. Diagnostic and statistical manual of mental disorders: DSM-III 3rd ed, revised. Washington, DC: American Psychiatric Association 1987.
- A2. Diagnostic and statistical manual of mental disorders: DSM-IV 4th ed. Washington, DC: American Psychiatric Association 1994.
- A3. Diagnostic and statistical manual of mental disorders: DSM-IV 4th ed, text revised. Washington, DC: American Psychiatric Association 2000.
- A4. The ICD-10 Classifications of Mental and Behavioural Disorder: Clinical Descriptions and Diagnostic Guidelines Geneva: World Health Organization 1992.
- A5. Sampson M, McGowan J, Lefebvre C, Moher D, Grimshaw J. PRESS: peer review of electronic search strategies. *Ottawa: Canadian Agency for Drugs and Technologies in Health*. 2008.
- A6. Alamri SH, Bari AI, Ali AT. Depression and associated factors in hospitalized elderly: a cross-sectional study in a Saudi teaching hospital. *Ann Saudi Med* 2017;37:122-129. doi:10.5144/0256-4947.2017.122
- A7. Amoozegar F, Patten SB, Becker WJ, et al. The prevalence of depression and the accuracy of depression screening tools in migraine patients. *Gen Hosp Psychiatry* 2017;48:25-31. doi: 10.1016/j.genhosppsy.2017.06.006
- A8. Amtmann D, Bamer AM, Johnson KL, et al. A comparison of multiple patient reported outcome measures in identifying major depressive disorder in people with multiple sclerosis. *J Psychosom Res* 2015;79:550-557. doi:10.1016/j.jpsychores.2015.08.007
- A9. Ayalon L, Goldfracht M, Bech P. 'Do you think you suffer from depression?' Re-evaluating the use of a single item question for the screening of depression in older primary care patients. *Int J Geriatr Psychiatry* 2010;25:497-502. doi: 10.1002/gps.2368

- A10. Beraldi A, Baklayan A, Hoster E, et al. Which questionnaire is most suitable for the detection of depressive disorders in haemato-oncological patients? Comparison between HADS, CES-D and PHQ-9. *Oncol Res Treat* 2014;37:108–109.
- A11. Bernstein CN, Zhang L, Lix LM, et al. The validity and reliability of screening measures for depression and anxiety disorders in inflammatory bowel disease. *Inflamm Bowel Dis* 2018;24:1867-1875. doi: 10.1093/ibd/izy068
- A12. Bhana A, Rathod SD, Selohilwe O, et al. The validity of the Patient Health Questionnaire for screening depression in chronic care patients in primary health care in South Africa. *BMC psychiatry* 2015;15:118. doi: 10.1186/s12888-015-0503-0
- A13. Bombardier CH, Kalpakjian CZ, Graves DE, et al. Validity of the Patient Health Questionnaire-9 in assessing major depressive disorder during inpatient spinal cord injury rehabilitation. *Arch Phys Med Rehabil* 2012;93:1838-1845. doi: 10.1016/j.apmr.2012.04.019
- A14. Chagas MH, Tumas V, Rodrigues GR, et al. Validation and internal consistency of Patient Health Questionnaire-9 for major depression in Parkinson's disease. *Age Ageing* 2013;42:645-49. doi: 10.1093/ageing/aft065
- A15. Chibanda D, Verhey R, Gibson LJ, et al. Validation of screening tools for depression and anxiety disorders in a primary care population with high HIV prevalence in Zimbabwe. *J Affect Disord* 2016;198:50-55. doi: 10.1016/j.jad.2016.03.006
- A16. Eack SM, Greeno CG, Lee BJ. Limitations of the Patient Health Questionnaire in identifying anxiety and depression in community mental health: many cases are undetected. *Res Soc Work Pract* 2006;16:625-631. doi: 10.1177/1049731506291582
- A17. Fann JR, Bombardier CH, Dikmen S, et al. Validity of the Patient Health Questionnaire-9 in assessing depression following traumatic brain injury. *J Head Trauma Rehabil* 2005;20:501-511. doi: 10.1097/00001199-200511000-00003

- A18. Fiest KM, Patten SB, Wiebe S, et al. Validating screening tools for depression in epilepsy. *Epilepsia* 2014;55:1642-1650. doi: 10.1111/epi.12754
- A19. Fischer HF, Klug C, Roeper K, et al. Screening for mental disorders in heart failure patients using computer-adaptive tests. *Qual Life Res* 2014;23:1609-1618. doi: 10.1007/s11136-013-0599-y
- A20. Gjerdingen D, Crow S, McGovern P, et al. Postpartum depression screening at well-child visits: validity of a 2-question screen and the PHQ-9. *Ann Fam Med* 2009;7:63-70. doi: 10.1370/afm.933
- A21. Gräfe K, Zipfel S, Herzog W, et al. Screening for psychiatric disorders with the Patient Health Questionnaire (PHQ). Results from the German validation study. *Diagnostica* 2004;50:171-181. doi: 10.1026/0012-1924.50.4.171
- A22. Green JD, Annunziata A, Kleiman SE, et al. Examining the diagnostic utility of the DSM-5 PTSD symptoms among male and female returning veterans. *Depress Anxiety* 2017;34:752-760. doi: 10.1002/da.22667
- A23. Green EP, Tuli H, Kwobah E, et al. Developing and validating a perinatal depression screening tool in Kenya blending Western criteria with local idioms: a mixed methods study. *J Affect Disord* 2018;228:49-59. doi: 10.1016/j.jad.2017.11.027
- A24. Haroz EE, Bass J, Lee C, et al. Development and cross-cultural testing of the International Depression Symptom Scale (IDSS): a measurement instrument designed to represent global presentations of depression. *Glob Ment Health (Camb)* 2017;4:e17. doi: 10.1017/gmh.2017.16
- A25. Hitchon CA, Zhang L, Peschken CA, et al. Validity and reliability of screening measures for depression and anxiety disorders in rheumatoid arthritis. *Arthritis Care Res (Hoboken)* 2020;72:1130-1139. doi: 10.1002/acr.24011

- A26. Khamseh ME, Baradaran HR, Javanbakht A, et al. Comparison of the CES-D and PHQ-9 depression scales in people with type 2 diabetes in Tehran, Iran. *BMC Psychiatry* 2011;11:61. doi: 10.1186/1471-244X-11-61
- A27. Kwan Y, Tham WY, Ang A. Validity of the Patient Health Questionnaire-9 (PHQ-9) in the screening of post-stroke depression in a multi-ethnic population. *Biol Psychiatry* 2012;71:141S-141S. doi: 10.1016/j.biopsych.2012.02.013
- A28. Lambert SD, Clover K, Pallant JF, et al. Making sense of variations in prevalence estimates of depression in cancer: a co-calibration of commonly used depression scales using Rasch analysis. *J Natl Compr Canc Netw* 2015;13:1203-1211. doi: 10.6004/jnccn.2015.0149
- A29. Lara MA, Navarrete L, Nieto L, et al. Prevalence and incidence of perinatal depression and depressive symptoms among Mexican women. *J Affect Disord* 2015;175:18-24. doi: 10.1016/j.jad.2014.12.035
- A30. Liu SI, Yeh ZT, Huang HC, et al. Validation of Patient Health Questionnaire for depression screening among primary care patients in Taiwan. *Compr Psychiatry* 2011;52:96-101. doi: 10.1016/j.comppsy.2010.04.013
- A31. Marrie RA, Zhang L, Lix LM, et al. The validity and reliability of screening measures for depression and anxiety disorders in multiple sclerosis. *Mult Scler Relat Disord* 2018;20:9-15. doi: 10.1016/j.msard.2017.12.007
- A32. Martin-Subero M, Kroenke K, Diez-Quevedo C, et al. Depression as measured by PHQ-9 versus clinical diagnosis as an independent predictor of long-term mortality in a prospective cohort of medical inpatients. *Psychosom Med* 2017;79:273-282. doi: 10.1097/PSY.0000000000000390

- A33. McGuire AW, Eastwood JA, Macabasco-O'Connell A, et al. Depression screening: utility of the Patient Health Questionnaire in patients with acute coronary syndrome. *Am J Crit Care* 2013;22:12-19. doi: 10.4037/ajcc2013899
- A34. Osório FL, Vilela Mendes A, Crippa JA, et al. Study of the discriminative validity of the PHQ-9 and PHQ-2 in a sample of Brazilian women in the context of primary health care. *Perspect Psychiatr Care* 2009;45:216-227. doi: 10.1111/j.1744-6163.2009.00224.x
- A35. Osório FL, Carvalho AC, Fracalossi TA, et al. Are two items sufficient to screen for depression within the hospital context? *Int J Psychiatry Med* 2012;44:141-148. doi: 10.2190/PM.44.2.e
- A36. Patten SB, Burton JM, Fiest KM, et al. Validity of four screening scales for major depression in MS. *Mult Scler* 2015;21:1064-1071. doi: 10.1177/1352458514559297
- A37. Picardi A, Adler DA, Abeni D, et al. Screening for depressive disorders in patients with skin diseases: a comparison of three screeners. *Acta Derm Venereol* 2005;85:414-419. doi: 10.1080/00015550510034966
- A38. Prisdie JC, Fiest KM, Coutts SB, et al. Validating screening tools for depression in stroke and transient ischemic attack patients. *Int J Psychiatry Med* 2016;51:262-277. doi: 10.1177/0091217416652616
- A39. Quinn TJ, Taylor-Rowan M, Elliott E, et al. Research protocol - Assessing Post-Stroke Psychology Longitudinal Evaluation (APPLE) study: A prospective cohort study in stroke. *Cereb Circ Cogn Behav* 2022;3:100042. doi: 10.1016/j.cccb.2022.100042.
- A40. Richardson TM, He H, Podgorski C, et al. Screening depression aging services clients. *Am J Geriatr Psychiatry* 2010;18:1116-1123. doi: 10.1097/JGP.0b013e3181dd1c26

- A41. Rooney AG, McNamara S, Mackinnon M, et al. Screening for major depressive disorder in adults with cerebral glioma: an initial validation of 3 self-report instruments. *Neuro Oncol* 2013;15:122-129. doi: 10.1093/neuonc/nos282
- A42. Shinn EH, Valentine A, Baum G, et al. Comparison of four brief depression screening instruments in ovarian cancer patients: diagnostic accuracy using traditional versus alternative cutpoints. *Gynecol Oncol* 2017;145:562-568. doi: 10.1016/j.ygyno.2017.03.024
- A43. Sidebottom AC, Harrison PA, Godecker A, et al. Validation of the Patient Health Questionnaire (PHQ)-9 for prenatal depression screening. *Arch Womens Ment Health* 2012;15:367-374. doi: 10.1007/s00737-012-0295-x
- A44. Simning A, van Wijngaarden E, Fisher SG, et al. Mental healthcare need and service utilization in older adults living in public housing. *Am J Geriatr Psychiatry* 2012;20:441-451. doi: 10.1097/JGP.0b013e31822003a7
- A45. Spangenberg L, Glaesmer H, Boecker M, et al. Differences in Patient Health Questionnaire and Aachen Depression Item Bank scores between tablet versus paper-and-pencil administration. *Qual Life Res* 2015;24:3023-3032. doi: 10.1007/s11136-015-1040-5
- A46. Turner A, Hambridge J, White J, et al. Depression screening in stroke: a comparison of alternative measures with the structured diagnostic interview for the Diagnostic and Statistical Manual of Mental Disorders, Fourth Edition (major depressive episode) as criterion standard. *Stroke* 2012;43:1000-1005. doi: 10.1161/STROKEAHA.111.643296
- A47. Turner, A, Clover, K, Carter, G, Hambridge, J, White, J, Nelson, L, Alston, M, & Baker, A. Touchscreen: A new approach to depression screening in CVD patients. Heart Foundation Conference 2011: Heart to Heart: from Access to Action, March 17 - 19, 2011. \* Winner 2nd Poster Prize

- A48. Twist K, Stahl D, Amiel SA, et al. Comparison of depressive symptoms in type 2 diabetes using a two-stage survey design. *Psychosom Med* 2013;75:791-797. doi: 10.1097/PSY.0b013e3182a2b108
- A49. Vöhringer PA, Jimenez MI, Igor MA, et al. Detecting mood disorder in resource-limited primary care settings: comparison of a self-administered screening tool to general practitioner assessment. *J Med Screen* 2013;20:118-124. doi: 10.1177/0969141313503954
- A50. Wagner LI, Pugh SL, Small Jr W, et al. Screening for depression in cancer patients receiving radiotherapy: feasibility and identification of effective tools in the NRG Oncology RTOG 0841 trial. *Cancer* 2017;123:485-93. doi: 10.1002/cncr.29969
- A51. Williams JR, Hirsch ES, Anderson K, et al. A comparison of nine scales to detect depression in Parkinson disease: which scale to use? *Neurology* 2012;78:998-1006. doi: 10.1212/WNL.0b013e31824d587f
- A52. Wittkamp K, van Ravesteijn H, Baas K, et al. The accuracy of Patient Health Questionnaire-9 in detecting depression and measuring depression severity in high-risk groups in primary care. *Gen Hosp Psychiatry* 2009;31:451-459. doi: 10.1016/j.genhosppsy.2009.06.001
- A53. Arroll B, Goodyear-Smith F, Crengle S, et al. Validation of PHQ-2 and PHQ-9 to screen for major depression in the primary care population. *Ann Fam Med* 2010;8:348-53. doi: 10.1370/afm.1139
- A54. Azah MN, Shah ME, Juwita S, et al. Validation of the Malay version brief Patient Health Questionnaire (PHQ-9) among adult attending family medicine clinics. *International Medical Journal* 2005;12:259-63.
- A55. De Man-van Ginkel JM, Hafsteinsdóttir T, Lindeman E, et al. An efficient way to detect poststroke depression by subsequent administration of a 9-item and a 2-item Patient Health Questionnaire. *Stroke* 2012;43:854-56. doi: 10.1161/STROKEAHA.111.640276



- A56. Delgadillo J, Payne S, Gilbody S, et al. How reliable is depression screening in alcohol and drug users? A validation of brief and ultra-brief questionnaires. *J Affect Disord* 2011;134:266-71. doi: 10.1016/j.jad.2011.06.017
- A57. Fisher J, Rowe H, Wynter K, et al. Gender-informed, psychoeducational programme for couples to prevent postnatal common mental disorders among primiparous women: cluster randomised controlled trial. *BMJ Open* 2016;6:e009396. doi:10.1136/bmjopen-2015-009396
- A58. Gelaye B, Tadesse MG, Williams MA, et al. Assessing validity of a depression screening instrument in the absence of a gold standard. *Ann Epidemiol* 2014;24:527-31. doi: 10.1016/j.annepidem.2014.04.009
- A59. Grool AM, van der Graaf Y, Mali WP, et al. Location of cerebrovascular and degenerative changes, depressive symptoms and cognitive functioning in later life: the SMART-Medea study. *J Neurol Neurosurg Psychiatry* 2011;82:1093-1100. doi:10.1136/jnnp.2010.232413
- A60. Hahn D, Reuter K, Harter M. Screening for affective and anxiety disorders in medical patients - comparison of HADS, GHQ-12 and Brief-PHQ. *Psychosoc Med* 2006;3.
- A61. Henkel V, Mergl R, Kohnen R, et al. Use of brief depression screening tools in primary care: consideration of heterogeneity in performance in different patient groups. *Gen Hosp Psychiatry* 2004;26:190-98. doi: 10.1016/j.genhosppsy.2004.02.003
- A62. Hobfoll SE, Canetti D, Hall BJ, et al. Are community studies of psychological trauma's impact accurate? A study among Jews and Palestinians. *Psychol Assess* 2011;23:599-605. doi: 10.1037/a0022817
- A63. Kiely KM, Butterworth P. Validation of four measures of mental health against depression and generalized anxiety in a community based sample. *Psychiatry Res* 2015;225:291-98. doi: 10.1016/j.psychres.2014.12.023

- A64. Kim DJ, Kim K, Lee HW, et al. Internet game addiction, depression, and escape from negative emotions in adulthood: a nationwide community sample of Korea. *J Nerv Ment Dis* 2017;205:568-73. doi: 10.1097/NMD.0000000000000698
- A65. Kohrt BA, Luitel NP, Acharya P, et al. Detection of depression in low resource settings: validation of the Patient Health Questionnaire (PHQ-9) and cultural concepts of distress in Nepal. *BMC Psychiatry* 2016;16:58. doi: 10.1186/s12888-016-0768-y
- A66. Liu Y, Wang J. Validity of the Patient Health Questionnaire-9 for DSM-IV major depressive disorder in a sample of Canadian working population. *J Affect Disord* 2015;187:122-26. doi: 10.1016/j.jad.2015.07.044
- A67. Mohd Sidik S, Arroll B, Goodyear-Smith F. Criterion validity of the PHQ-9 (Malay version) in a primary care clinic in Malaysia. *Med J Malaysia* 2012;67:309-15.
- A68. Patel V, Araya R, Chowdhary N, et al. Detecting common mental disorders in primary care in India: a comparison of five screening questionnaires. *Psychol Med* 2008;38:221-28. doi: 10.1017/S0033291707002334
- A69. Pence BW, Gaynes BN, Atashili J, et al. Validity of an interviewer-administered Patient Health Questionnaire-9 to screen for depression in HIV-infected patients in Cameroon. *J Affect Disord* 2012;143:208-13. doi: 10.1016/j.jad.2012.05.056
- A70. Razykov I, Hudson M, Baron M, et al. Utility of the Patient Health Questionnaire-9 to assess suicide risk in patients with systemic sclerosis. *Arthritis Care Res (Hoboken)* 2013;65:753-58. doi: 10.1002/acr.21894
- A71. Thombs BD, Ziegelstein RC, Whooley MA. Optimizing detection of major depression among patients with coronary artery disease using the Patient Health Questionnaire: data from the heart and soul study. *J Gen Intern Med* 2008;23:2014-17. doi: 10.1007/s11606-008-0802-y

- A72. Zuithoff NP, Vergouwe Y, King M, et al. A clinical prediction rule for detecting major depressive disorder in primary care: the PREDICT-NL study. *Fam Pract* 2009;26:241-50. doi: 10.1093/fampra/cmp036
- A73. Akena D, Joska J, Obuku EA, et al. Sensitivity and specificity of clinician administered screening instruments in detecting depression among HIV-positive individuals in Uganda. *AIDS Care* 2013;25:1245-52. doi: 10.1080/09540121.2013.764385
- A74. Baron EC, Davies T, Lund C. Validation of the 10-item Centre for Epidemiological Studies Depression scale (CES-D-10) in Zulu, Xhosa and Afrikaans populations in South Africa. *BMC Psychiatry* 2017;17:6. doi: 10.1186/s12888-016-1178-x
- A75. Buji RI, Abdul Murad NA, Chan LF, et al. Suicidal ideation in systemic lupus erythematosus: NR2A gene polymorphism, clinical and psychosocial factors. *Lupus* 2018;27:744-52. doi: 10.1177/0961203317742711
- A76. Cholera R, Gaynes BN, Pence BW, et al. Validity of the Patient Health Questionnaire-9 to screen for depression in a high-HIV burden primary healthcare clinic in Johannesburg, South Africa. *J Affect Disord* 2014;167:160-66. doi: 10.1016/j.jad.2014.06.003
- A77. Conway A, Sheridan J, Maddicks-Law J, et al. Accuracy of anxiety and depression screening tools in heart transplant recipients. *Appl Nurs Res* 2016;32:177-81. doi: 10.1016/j.apnr.2016.07.015
- A78. de la Torre AY, Oliva N, Echevarrieta PL, et al. Major depression in hospitalized Argentine general medical patients: prevalence and risk factors. *J Affect Disord* 2016;197:36-42. doi: 10.1016/j.jad.2016.02.066
- A79. Garabiles MR, Lao CK, Yip P, Chan EWW, Mordeno I, Hall BJ. Psychometric validation of PHQ-9 and GAD-7 in Filipino migrant domestic workers in Macao (SAR), China. *J Pers Assess* 2020;102(6):833-844. doi: 10.1080/00223891.2019.1644343.

- A80. Gholizadeh L, Shahmansouri N, Heydari M, et al. Assessment and detection of depression in patients with coronary artery disease: validation of the Persian version of the PHQ-9. *Contemp Nurse* 2019;55:185-94. doi: 10.1080/10376178.2019.1641119
- A81. Hantsoo L, Podcasy J, Sammel M, et al. Pregnancy and the acceptability of computer-based versus traditional mental health treatments. *J Womens Health (Larchmt)* 2017;26:1106-13. doi: 10.1089/jwh.2016.6255
- A82. Hides L, Lubman DI, Devlin H, et al. Reliability and validity of the Kessler 10 and Patient Health Questionnaire among injecting drug users. *Aust N Z Psychiatry* 2007;41:166-68. doi: 10.1080/00048670601109949
- A83. Hyphantis T, Kotsis K, Voulgari PV, et al. Diagnostic accuracy, internal consistency, and convergent validity of the Greek version of the Patient Health Questionnaire 9 in diagnosing depression in rheumatologic disorders. *Arthritis Care Res (Hoboken)* 2011;63:1313-21. doi: 10.1002/acr.20505.
- A84. Hyphantis T, Kroenke K, Papatheodorou E, et al. Validity of the Greek version of the PHQ 15-item Somatic Symptom Severity Scale in patients with chronic medical conditions and correlations with emergency department use and illness perceptions. *Compr Psychiatry* 2014;55:1950-59. doi: 10.1016/j.comppsy.2014.08.042
- A85. Inagaki M, Ohtsuki T, Yonemoto N, et al. Validity of the Patient Health Questionnaire (PHQ)-9 and PHQ-2 in general internal medicine primary care at a Japanese rural hospital: a cross-sectional study. *Gen Hosp Psychiatry* 2013;35:592-97. doi: 10.1016/j.genhosppsy.2013.08.001
- A86. Janssen EP, Köhler S, Stehouwer CD, et al. The Patient Health Questionnaire-9 as a screening tool for depression in individuals with type 2 diabetes mellitus: the Maastricht study. *J Am Geriatr Soc* 2016;64:e201-06. doi: 10.1111/jgs.14388

- A87. Lamers F, Jonkers CC, Bosma H, et al. Summed score of the Patient Health Questionnaire-9 was a reliable and valid method for depression screening in chronically ill elderly patients. *J Clin Epidemiol* 2008;61:679-87. doi: 10.1016/j.jclinepi.2007.07.018
- A88. Levin-Aspenson HF, Watson D. Mode of administration effects in psychopathology assessment: analyses of sex, age, and education differences in self-rated versus interview-based depression. *Psychol Assess* 2018;30:287-295. doi: 10.1037/pas0000474
- A89. Liu h, He YL, Miao JM, et al. Validity and reliability of the 12-item Short Form Health Survey in outpatients from traditional Chinese internal department. *Chinese Mental Health Journal* 2016;30:6-12.
- A90. Lotrakul M, Sumrithe S, Saipanish R. Reliability and validity of the Thai version of the PHQ-9. *BMC Psychiatry* 2008;8:46. doi: 10.1186/1471-244X-8-46
- A91. Muramatsu K, Miyaoka H, Kamijima K, et al. The Patient Health Questionnaire, Japanese version: validity according to the Mini-International Neuropsychiatric Interview-Plus. *Psychol Rep* 2007;101:952-60. doi: 10.2466/pr0.101.3.952-960.
- A92. Muramatsu K, Miyaoka H, Kamijima K, et al. Performance of the Japanese version of the Patient Health Questionnaire-9 (J-PHQ-9) for depression in primary care. *Gen Hosp Psychiatry* 2018;52:64-9. doi: 10.1016/j.genhosppsych.2018.03.007
- A93. Nakku JE, Rathod SD, Kizza D, et al. Validity and diagnostic accuracy of the Luganda version of the 9-item and 2-item Patient Health Questionnaire for detecting major depressive disorder in rural Uganda. *Glob Ment Health (Camb)* 2016;3:e20. doi: 10.1017/gmh.2016.14
- A94. Paika V, Andreoulakis E, Ntountoulaki E, et al. The Greek-Orthodox version of the Brief Religious Coping (B-RCOPE) instrument: psychometric properties in three samples and associations with mental disorders, suicidality, illness perceptions, and quality of life. *Ann Gen Psychiatry* 2017;16:13. doi: 10.1186/s12991-017-0136-4

- A95. Persoons P, Luyckx K, Fischler B. Psychiatric diagnoses in Gastroenterology: validation of a self-report instrument (PRIME-MD Patient Health Questionnaire), epidemiology and recognition. *Gastroenterology* 2001;120:A114-A114. doi: 10.1016/S0016-5085(08)80560-4
- A96. Rancans E, Trapencieris M, Ivanovs R, et al. Validity of the PHQ-9 and PHQ-2 to screen for depression in nationwide primary care population in Latvia. *Ann Gen Psychiatry* 2018;17:33. doi: 10.1186/s12991-018-0203-5
- A97. Santos IS, Tavares BF, Munhoz TN, et al. [Sensitivity and specificity of the Patient Health Questionnaire-9 (PHQ-9) among adults from the general population.] *Cad Saude Publica* 2013;29:1533-43. doi: 10.1590/0102-311x00144612
- A98. Stafford L, Berk M, Jackson HJ. Validity of the Hospital Anxiety and Depression Scale and Patient Health Questionnaire-9 to screen for depression in patients with coronary artery disease. *Gen Hosp Psychiatry* 2007;29:417-24. doi: 10.1016/j.genhosppsy.2007.06.005
- A99. Sung SC, Low CC, Fung DS, et al. Screening for major and minor depression in a multiethnic sample of Asian primary care patients: a comparison of the nine-item Patient Health Questionnaire (PHQ-9) and the 16-item Quick Inventory of Depressive Symptomatology - Self-Report (QIDS-SR16). *Asia Pac Psychiatry* 2013;5:249-58. doi: 10.1111/appy.12101
- A100. Suzuki K, Kumei S, Ohhira M, et al. Screening for major depressive disorder with the Patient Health Questionnaire (PHQ-9 and PHQ-2) in an outpatient clinic staffed by primary care physicians in Japan: a case control study. *PloS One* 2015;10:e0119147. doi: 10.1371/journal.pone.0119147

- A101. van Heyningen T, Honikman S, Tomlinson M, et al. Comparison of mental health screening tools for detecting antenatal depression and anxiety disorders in South African women. *PLoS One* 2018;13:e0193697. doi: 10.1371/journal.pone.0193697
- A102. van Steenberg-Weijenburg KM, de Vroeghe L, Ploeger RR, et al. Validation of the PHQ-9 as a screening instrument for depression in diabetes patients in specialized outpatient clinics. *BMC Health Serv Res* 2010;10:235. doi: 10.1186/1472-6963-10-235
- A103. Volker D, Zijlstra-Vlasveld MC, Brouwers EP, et al. Validation of the Patient Health Questionnaire-9 for major depressive disorder in the occupational health setting. *J Occup Rehabil* 2016;26:237-44. doi: 10.1007/s10926-015-9607-0
- A104. Wang W, Bian Q, Zhao Y, et al. Reliability and validity of the Chinese version of the Patient Health Questionnaire (PHQ-9) in the general population. *Gen Hosp Psychiatry* 2014;36:539-44. doi: 10.1016/j.genhosppsy.2014.05.021
- A105. Zhang Y, Ting R, Lam M, et al. Measuring depressive symptoms using the Patient Health Questionnaire-9 in Hong Kong Chinese subjects with type 2 diabetes. *J Affect Disord* 2013;151:660-66. doi: 10.1016/j.jad.2013.07.01
